# Supplementary material for: Essential turmeric oils enhance anti-inflammatory efficacy of curcumin in dextran sulfate sodium-induced colitis
Source: PubMed Central journal article supplement (PMC5429743; doi:10.1038/s41598-017-00812-6), 2017-04-11

## **SUPPLEMENTARY INFORMATION**

### **Essential turmeric oils enhance anti-inflammatory efficacy of curcumin in dextran sulfate sodium-induced colitis**

Shusuke Toden, Arianne L. Theiss, Xuan Wang and Ajay Goel

**Supplementary Table 1: Mathematical comparison of DAI associated parameters between doses for each curcumin treatment**

| Day 5                    |                 |              |                 |               | Day 7                    |                 |       |                 |               |
|--------------------------|-----------------|--------------|-----------------|---------------|--------------------------|-----------------|-------|-----------------|---------------|
|                          | Dose comparison |              | Dose comparison |               |                          | Dose comparison |       | Dose comparison |               |
|                          | P-values        |              | P-values        |               |                          | P-values        |       | P-values        |               |
|                          | Standard        |              | ETO             |               |                          | Standard        |       | ETO             |               |
| <b>DAI</b>               | 5 v 25          | 0.764        | 5 v 25          | 0.056         | <b>DAI</b>               | 5 v 25          | 0.937 | 5 v 25          | 0.13          |
|                          | 25 v 50         | 0.248        | 25 v 50         | <b>0.033</b>  |                          | 25 v 50         | 0.463 | 25 v 50         | <b>0.027</b>  |
|                          | 5 v 50          | 0.143        | 5 v 50          | <b>0.0001</b> |                          | 5 v 50          | 0.499 | 5 v 50          | <b>0.0003</b> |
| <b>Weight change</b>     | 5 v 25          | 0.556        | 5 v 25          | <b>0.022</b>  | <b>Weight change</b>     | 5 v 25          | 0.848 | 5 v 25          | 0.05          |
|                          | 25 v 50         | <b>0.023</b> | 25 v 50         | 0.256         |                          | 25 v 50         | 0.075 | 25 v 50         | 0.071         |
|                          | 5 v 50          | 0.071        | 5 v 50          | <b>0.0007</b> |                          | 5 v 50          | 0.099 | 5 v 50          | <b>0.0003</b> |
| <b>Stool consistency</b> | 5 v 25          | 0.872        | 5 v 25          | 0.477         | <b>Stool consistency</b> | 5 v 25          | 0.769 | 5 v 25          | 0.665         |
|                          | 25 v 50         | 0.267        | 25 v 50         | 0.058         |                          | 25 v 50         | 0.487 | 25 v 50         | 0.187         |
|                          | 5 v 50          | 0.325        | 5 v 50          | <b>0.01</b>   |                          | 5 v 50          | 0.661 | 5 v 50          | 0.081         |
| <b>Fecal bleeding</b>    | 5 v 25          | 0.57         | 5 v 25          | 0.099         | <b>Fecal bleeding</b>    | 5 v 25          | 0.787 | 5 v 25          | 0.165         |
|                          | 25 v 50         | 0.804        | 25 v 50         | 0.113         |                          | 25 v 50         | 0.751 | 25 v 50         | 0.061         |
|                          | 5 v 50          | 0.42         | 5 v 50          | <b>0.002</b>  |                          | 5 v 50          | 0.942 | 5 v 50          | <b>0.001</b>  |

**DAI: Disease activity index**

**Supplementary Table 2: Mathematical comparison between ETO- and standard curcumin in DAI associated parameters**

| <b>P-Values</b>          |              |              |              |                |
|--------------------------|--------------|--------------|--------------|----------------|
| <b>Dose (mg/kg)</b>      | <b>Day 3</b> | <b>Day 5</b> | <b>Day 7</b> | <b>Overall</b> |
| <b>DAI</b>               |              |              |              |                |
| <b>5</b>                 | 0.73         | 0.657        | 0.301        | 0.344          |
| <b>25</b>                | 0.851        | 0.279        | 0.529        | 0.429          |
| <b>50</b>                | 0.921        | 0.237        | <b>0.043</b> | 0.08           |
| <b>Weight changes</b>    |              |              |              |                |
| <b>5</b>                 | 0.739        | 0.505        | 0.405        | 0.562          |
| <b>25</b>                | 0.321        | <b>0.002</b> | <b>0.003</b> | <b>0.0008</b>  |
| <b>50</b>                | 0.739        | 0.184        | <b>0.005</b> | <b>0.024</b>   |
| <b>Stool consistency</b> |              |              |              |                |
| <b>5</b>                 | 1            | 0.362        | 0.274        | 0.274          |
| <b>25</b>                | 0.656        | 0.656        | 0.729        | 0.849          |
| <b>50</b>                | 1            | 0.412        | 0.781        | 0.549          |
| <b>Fecal bleeding</b>    |              |              |              |                |
| <b>5</b>                 | 0.624        | 0.769        | 0.172        | 0.271          |
| <b>25</b>                | 0.633        | 0.873        | 0.873        | 0.682          |
| <b>50</b>                | 1            | 0.493        | <b>0.005</b> | 0.156          |

**DAI: Disease activity index**

**Supplementary Table 3: Primer lists**

| Primers |           | Sequence                         |
|---------|-----------|----------------------------------|
| FOXP3   | (forward) | 5'-GGTACACCCAGGAAAGACAG          |
|         | (reverse) | 5'-ATCCAGGAGATGATCTGCTTG         |
| IL10    | (forward) | 5'-GGTTGCCAAGCCTTATCGGA          |
|         | (reverse) | 5'-ACCTGCTCCACTGCCTTGCT          |
| IL-11   | (forward) | 5'-CTGCAAGCCCGACTGGAA            |
|         | (reverse) | 5'-AGGCCAGGCGAGACATCA            |
| CCL17   | (forward) | 5'-CCCATGAAGACCTTCACCTC          |
|         | (reverse) | 5'-CATCCCTGGAACACTCCACT          |
| CXCL5   | (forward) | 5'-CTCAGTCATAGCCGCAACCGAGC       |
|         | (reverse) | 5'-CGCTTCTTTCCACTGCGAGTGC        |
| 18S     | (forward) | 5'-<br>CCCCTCGATGCTCTTAGCTGAGTGT |
|         | (reverse) | 5'-<br>CGCCGGTCCAAGAATTCACCTCT   |

**Supplementary Figure 1: ETO-curcumin exerts superior anti-inflammatory effects compared to standard curcumin and ETO on DSS-induced inflammation at 50 mg/kg body weight** **A)** Graphical representation of curcumin treatment strategy **B)** Changes in individual categories of DAI (top), body weight changes, stool consistency and stool bleeding (left-right). Changes in disease activity index (DAI) (bottom). \*=  $p < 0.05$ , \*\*=  $p < 0.01$ , \*\*\*=  $p < 0.001$ .

**Supplementary Figure 2: Effects of ETO-curcumin and standard curcumin on DSS-induced inflammation at 5 mg/kg body weight daily gavaging** **A)** Graphical representation of curcumin treatment strategy **B)** Changes in individual categories of DAI (top), body weight changes, stool consistency and stool bleeding (left-right). Changes in disease activity index (DAI) (bottom). **C)** Colon length, **D)** Spleen weight and **E)** Histology score on day 7. \*=  $p < 0.05$ , \*\*=  $p < 0.01$ , \*\*\*=  $p < 0.001$ .

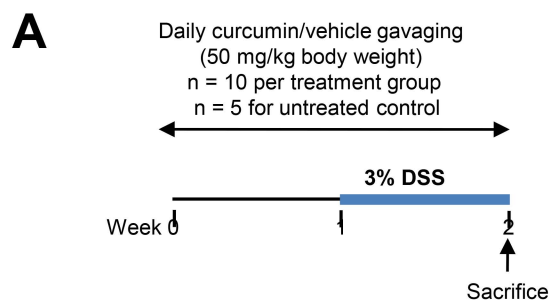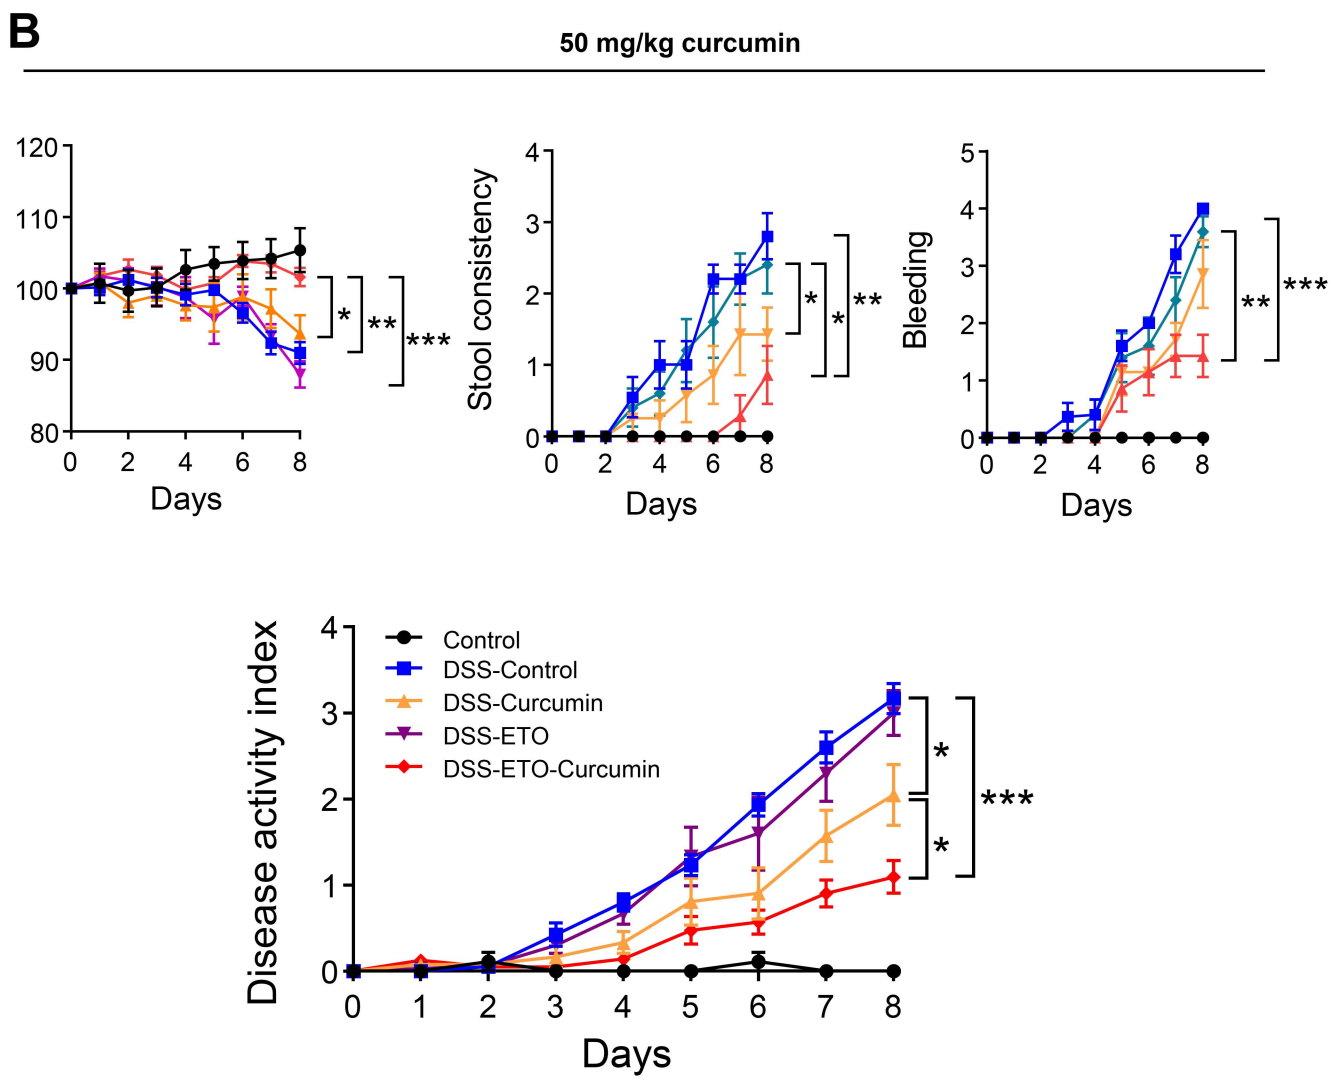

**A**

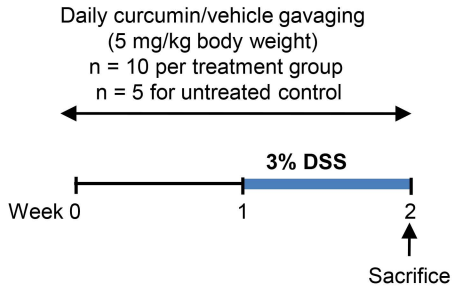

**B**

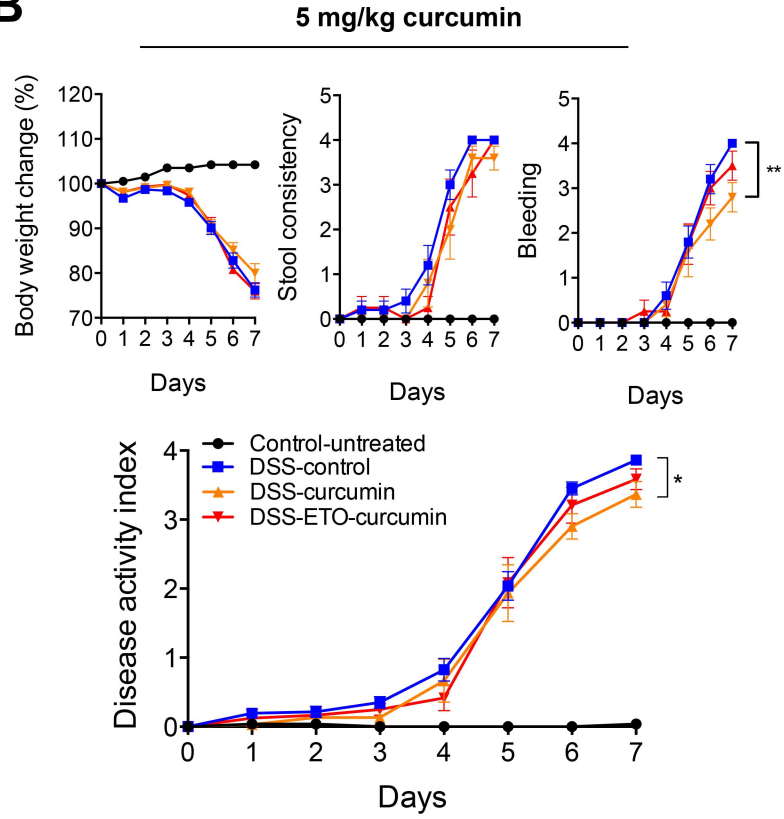

**C**

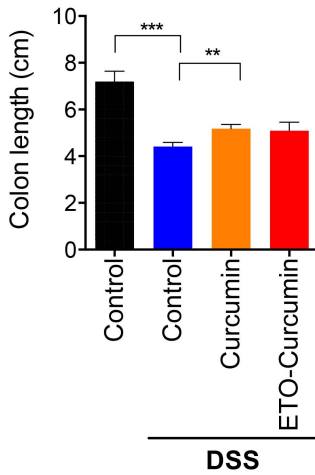

**D**

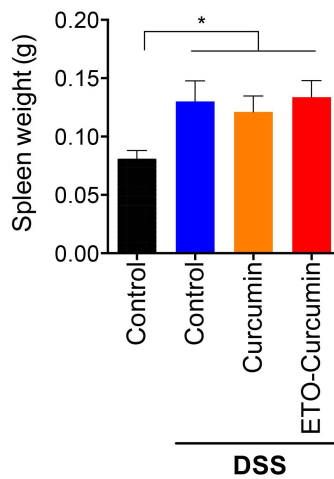

**E**

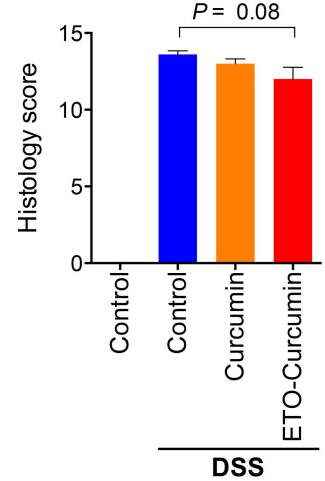

Supplement: 41598_2017_812_MOESM1_ESM.pdf [file 41598_2017_812_MOESM1_ESM.pdf]
